# Supplementary material for: Separation of 100 nm-sized nanoparticles using a poly-Lys-modified monolith column
Source: Royal Society of Chemistry journal article supplement (doi:10.1039/d4ra07906j), 2025-01-01
Supplement: d4ra07906j1.pdf [file d4ra07906j1.pdf]

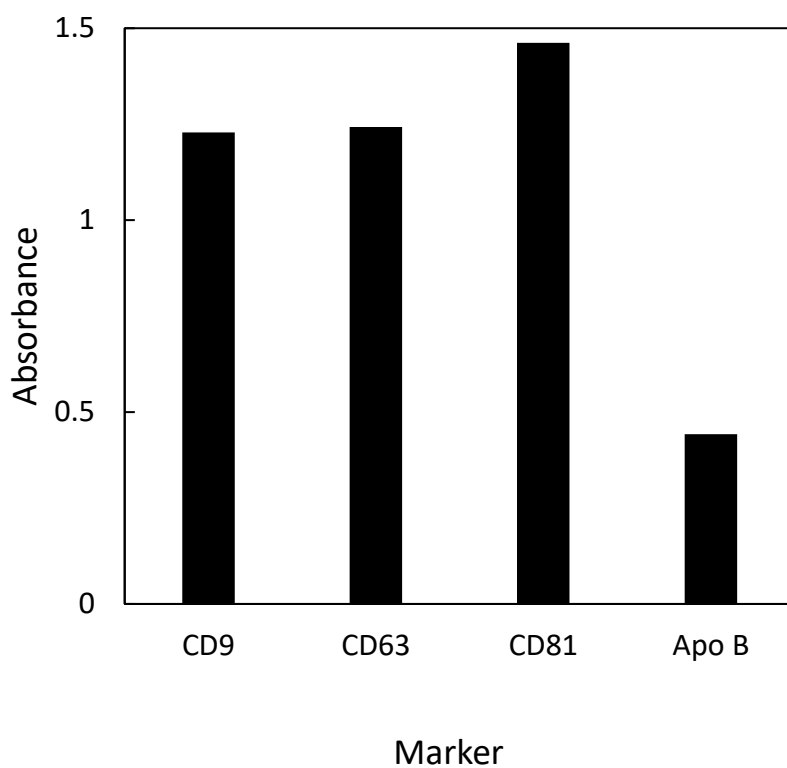

Fig. S1 sEV validation by ELISA

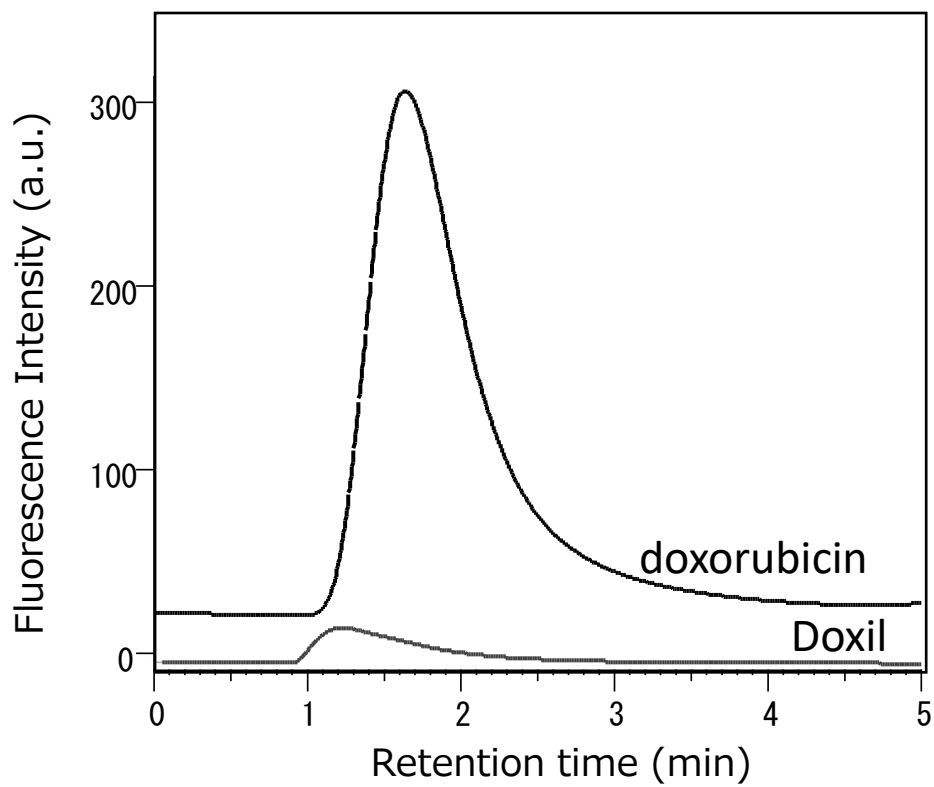

Fig. S2 Chromatograms of doxorubicin and Doxil at the same dose of doxorubicin

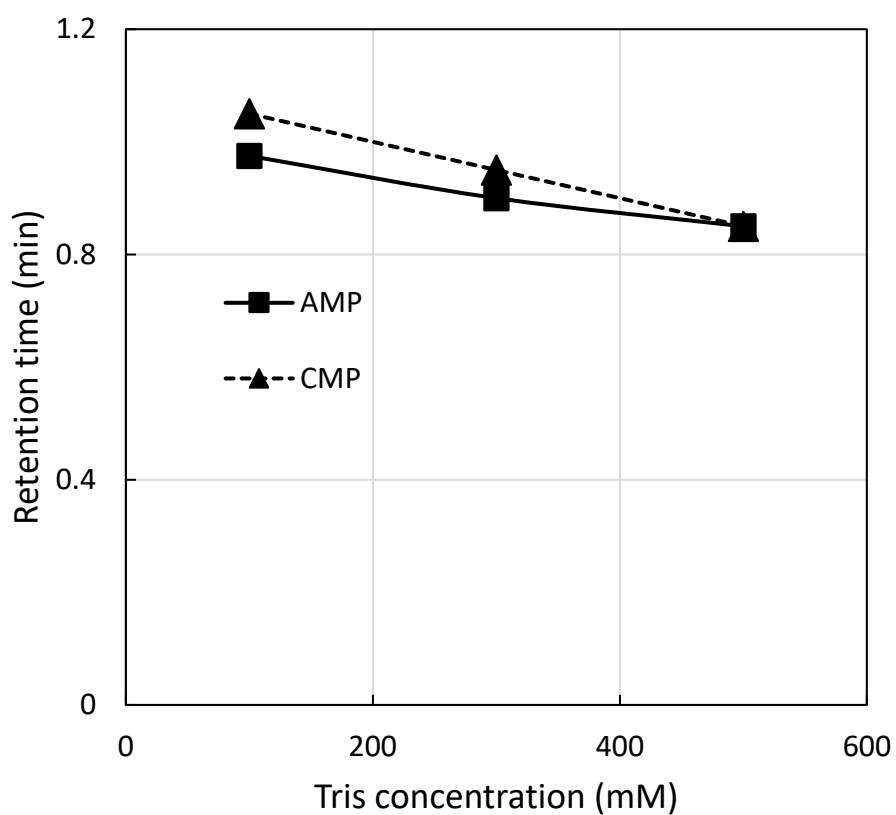

Fig. S3 Effect of Tris concentration on the retention times of adenosine 5'-monophosphate (AMP) and cytidine 5'-monophosphate (CMP).  
Mobile phase: Tris buffer (pH7)
